# Supplementary material
Source: Springer Nature journal article supplement (https://hal.science/hal-05610111/file/13567_2026_1716_MOESM1_ESM.pdf)

## 293T

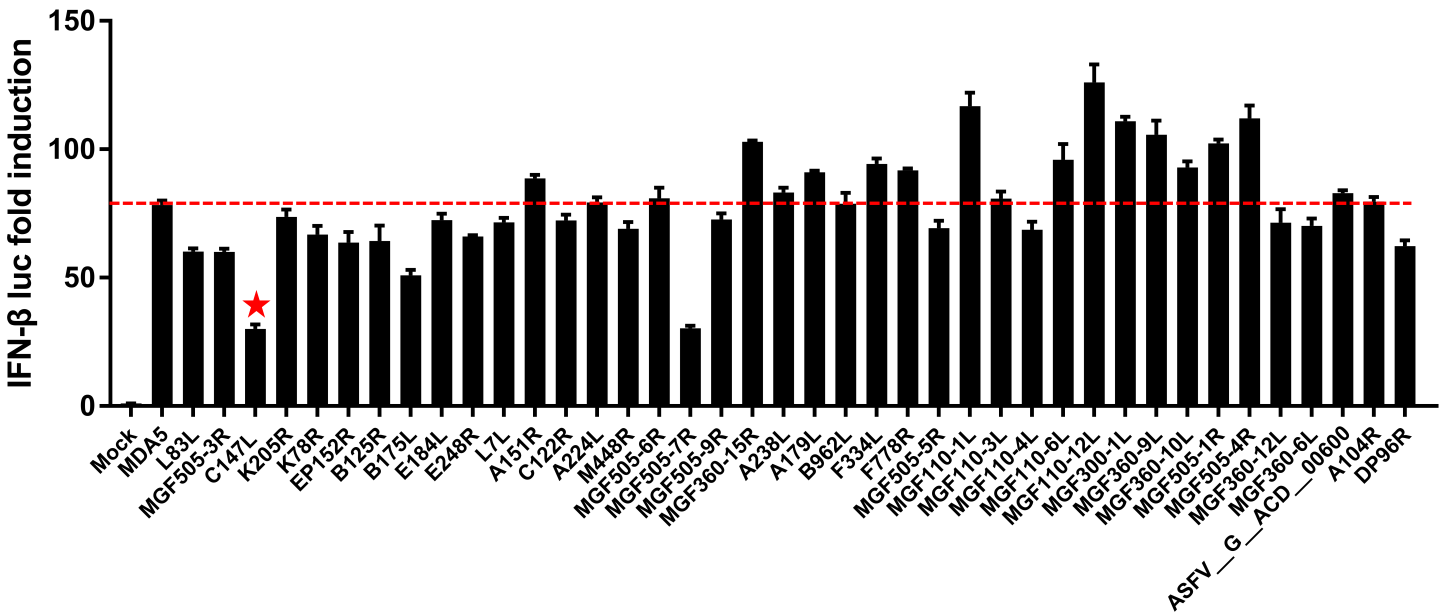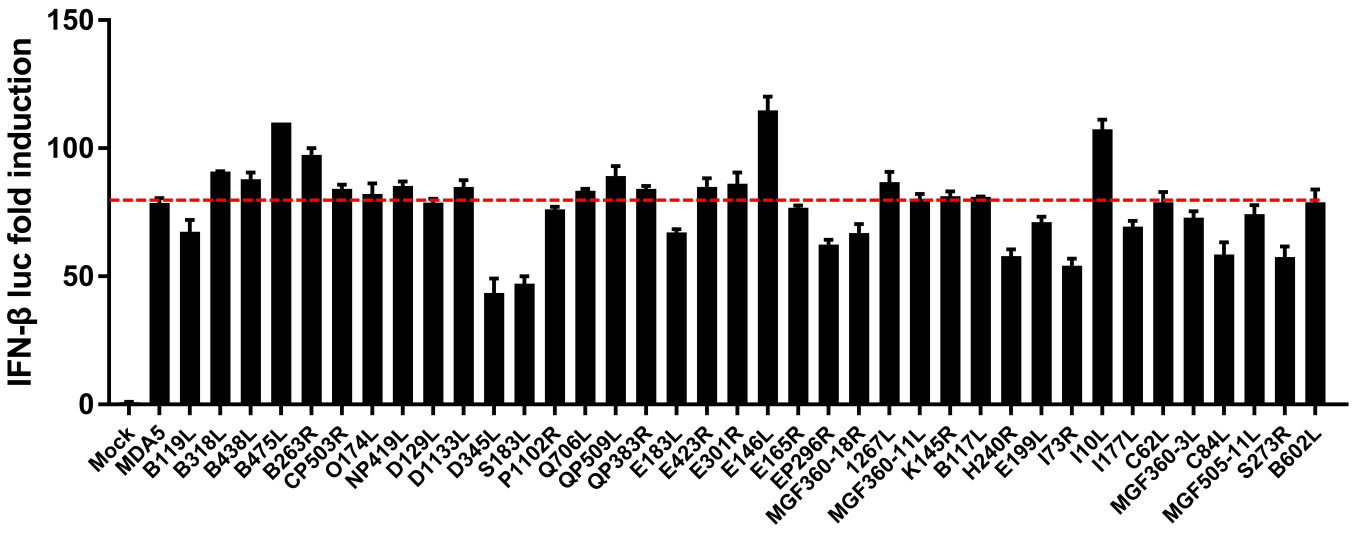

Supplement: MOESM1 [file 13567_2026_1716_MOESM1_ESM.pdf]
